# Supplementary material for: Dietary treatment of Crohn’s disease: perceptions of families with children treated by exclusive enteral nutrition, a questionnaire survey
Source: BMC Gastroenterol. 2017 Jan 19;17:14. doi: 10.1186/s12876-016-0564-7 (PMC5247812; doi:10.1186/s12876-016-0564-7)
Supplement: Additional file 4: — Raw data analysed during this study. (XLSX 15 kb) [file 12876_2016_564_MOESM4_ESM.xlsx]

## Sheet: Raw data-Answers
Participant No	Parents-Q1	Parents-Q2	Age group of CD child	Parents-Q3	Parents-Q4	Parents-Q5	Parents-Q6	Parents-Q7	Parents-Q8	Parents-Q9	Parents-Q10	Parents-Q11	Parents-Q12	Children-Q1	Children-Q2	Children-Q3	Children-Q4	Children-Q5	Children-Q6	Children-Q7	Children-Q8	Children-Q9
#	1	0	c	1	1	86	3	1	1	1	1	1	1	1	1	1	90	1	1	5	1	1
#	1	0	c	1	1	41	1	1	1	1	21	1	0	1	1	1	47	1	1	1	0	1
#	1	0	c	1	1	46	3	0	1	*	41	1	1	1	1	1	72	1	1	23	1	1
#	1	0	c	1	1	9	0	1	1	1	2	1	1	1	1	1	*	1	1	1	1	1
#	1	0	b	1	1	1	0	1	1	*	1	0	1	1	1	1	1	1	1	1	0	1
#	1	0	c	1	0	70	1	0	0	1	37	1	1	1	1	0	100	0	0	10	1	1
#	1	0	c	1	1	77	0	1	0	1	13	1	1	1	1	1	82	0	1	15	1	1
#	1	0	c	1	0	95	0	1	0	1	51	1	1	1	1	0	95	0	1	47	0	1
#	1	0	c	1	1	1	0	1	1	1	1	1	1	1	1	1	*	1	0	48	1	1
#	1	0	c	1	1	25	0	1	1	1	5	1	1	1	1	1	19	1	1	1	1	*
#	1	0	c	1	0	70	0	1	0	1	55	0	1	1	1	0	89	0	1	15	1	0
#	1	0	b	1	0	49	3	1	*	*	43	*	*	1	1	0	61	*	2	22	*	*
#	1	0	c	1	1	54	3	0	1	*	51	1	1	1	1	1	*	1	0	46	1	*
#	1	1	c	1	1	56	3	0	1	0	100	1	1	1	1	1	64	1	0	71	1	*
#	1	0	c	1	1	23	2	0	1	1	66	1	1	1	1	1	30	1	1	43	1	1
#	1	1	c	1	1	*	3	1	1	1	1	1	1	1	1	1	*	0	1	*	1	1
#	1	0	c	1	1	90	3	1	1	1	59	1	1	1	1	1	32	1	0	44	1	0
#	1	0	c	1	0	100	3	1	0	1	25	0	1	1	1	0	74	0	1	1	0	1
#	1	0	c	1	1	17	0	1	*	1	*	1	1	1	1	1	3	1	0	31	1	1
#	1	0	b	1	1	4	3	1	0	1	1	1	1	1	1	1	*	0	1	15	1	1
#	1	0	b	1	1	7	0	1	1	1	12	1	1	1	1	1	1	1	1	24	1	1
#	1	0	c	1	1	87	0	1	*	1	37	1	*	1	1	1	*	*	1	*	1	1
#	1	1	a	1	1	62	2	0	1	1	22	1	1	1	1	1	62	*	*	23	*	*
#	1	0	c	1	0	34	0	1	0	1	3	1	1	1	1	0	61	0	1	10	1	1
#	1	0	c	1	1	78	0	1	0	1	28	1	1	1	1	1	*	0	1	37	1	1
#	1	0	c	1	1	52	0	1	1	0	77	0	1	1	1	1	*	1	0	82	0	1
#	1	0	c	1	1	77	1	0	0	1	15	1	1	1	1	1	63	1	1	7	1	1
#	1	0	b	1	1	8	1	1	1	0	35	1	1	1	1	1	14	1	0	72	1	0
#	1	0	b	1	1	12	2	1	1	0	78	0	0	1	1	1	*	1	1	96	0	0
