# Supplementary material for: Dietary treatment of Crohn’s disease: perceptions of families with children treated by exclusive enteral nutrition, a questionnaire survey
Source: Springer Nature journal article supplement (doi:10.1186/s12876-016-0564-7), 2017-01-19
Supplement: MOESM3 [file 12008186]

**Survey on Dietary Treatment for Crohn's Disease**  
**Adult/Carer Version**

Your child had a special liquid-only diet under the care of the Yorkhill IBD team during 2015. This was used to treat their Crohn's disease either at the time they were diagnosed or when their disease flared up. This was most likely to be a feed called 'Modulen IBD' but for younger children it may have been a feed with a different name. We want to know how it went and what you would think of a new study looking to compare this liquid-only diet with a new solid food diet for Crohn's disease.

(Q1) Are you the parent of a child with Crohn's disease?

Yes

No

(Q2) Do either of the parents of your child have inflammatory bowel disease?

Yes

No

(Q3) About your child:

Age: \_\_\_\_\_years, \_\_\_\_\_months (example: 12 years, 8 months)

(Q4) Is your child: Male  Female

(Q5) Did your child receive a liquid-only diet for a number of weeks?

Yes

No

(Q6) Did your child complete 8 weeks of liquid-only diet?

Yes

No

If Yes, please move on to Q8, otherwise please complete Q7.

**Survey on Dietary Treatment for Crohn's Disease**  
**Adult/Carer Version**

(Q7) Why did your child not complete the course?

We have left this question open for you to answer. Please provide as much detail as possible. It would be helpful if you could also tell us how many weeks were completed.

---

For Q8 and Q14 please make a mark on the line under the question to indicate the best answer.

(Q8) How easy was it for your child to take the liquid-only diet?

|            |       |            |
|------------|-------|------------|
| No Problem | _____ | Impossible |
|------------|-------|------------|

(Q9) Did your child require a nasogastric tube for the liquid-only diet?

Yes- feeding pump used

Yes- syringe "bolus" used

No

(Q10) Was this your child's first course of liquid-only diet?

Yes

No

(Q11) If the answer to Q10 was No, how many previous courses have they had?

---

(Q12) If your child had a further flare of Crohn's disease, do you think they could complete another course of liquid-only diet?

Yes

No

We are currently designing a new diet based on the milks used for liquid-only diet, but using solid food rather than entirely liquid. We have attached an example on Page 5. The diet we propose has not yet been tested in patients with Crohn's disease, so would first need a scientific study comparing it directly to the liquid-only diet.

**Survey on Dietary Treatment for Crohn's Disease**  
**Adult/Carer Version**

(Q13) Do you think such a solid food based diet would be better than the liquid diet?

Yes

No

(Q14) How easy do you think it would be for your child to take a solid food diet like the one proposed on Page 5?

No Problem

Impossible

(Q15) Do you think it would be easier to complete 8 weeks on a solid food diet, like shown on Page 5, or the liquid-only diet?

Solid food

Liquid-only

(Q16) Would you be interested in participating in a study of a solid food diet, like the one on Page 5, compared with liquid-only diet?

Yes

No

The best way to conduct a study comparing a new treatment and an old one, that we know works well, is by a randomised controlled trial. In a randomised controlled trial patients who we think would benefit from the liquid-only diet, and who agree to take part in the study, would be split evenly (50:50) between it and the new treatment. The choice would be made randomly, for example by tossing a coin, to make sure both groups were similar.

(Q17) Would you be happy for your child to participate in such a study if doctors felt they needed a repeat of their liquid-only diet for Crohn's disease?

Yes

No

**Survey on Dietary Treatment for Crohn's Disease**  
**Adult/Carer Version**

(Q18) Do you think your child would take the solid food diet (outlined on Page 5) beyond 8 weeks if it was effective in treating their Crohn's disease and meant less medications?

Yes

No

(Q19) Do you have any other comments on your experience of the liquid-only diet or the solid food diet proposed?

---

---

---

---

---

Thank you for taking the time to complete this survey. We realise the questions being asked of you and your child are very similar, but we want to see whether children and parents have different views on liquid diet in Crohn's disease. We would appreciate both questionnaires being completed and returned together.

The IBD Team at Yorkhill.

Please return the surveys together in the provided stamped addressed envelope.

## **Example Diet**

Please note this is **NOT** the actual diet we are proposing. It is very important that the solid food diet is tested rigorously in children with Crohn's disease in a scientific manner before we start using it, so we have designed an example based on the kind of restriction to normal diet that would be needed. The diet proposed on this sheet will not treat or help Crohn's disease and **should not be followed**.

### **Breakfast**

Certain types of dairy products  
Certain types of breakfast cereals  
Certain types of juices

### **Morning Snack**

Certain types of juices  
Certain types of bread, dairy and meat products

### **Lunch**

Certain types of bread and starchy foods  
Certain types of dairy and meat products  
Certain types of vegetables  
Certain types of cooking and salad oils

### **Afternoon Snack**

Certain types of dairy products  
Selected types of fruits and vegetables

### **Dinner**

Certain types of bread and starchy foods  
Certain types of dairy and meat products  
Certain type of vegetables  
Certain types of cooking and salad oils
